# Supplementary material
Source: Research Square preprint supplement (doi:10.21203/rs.3.rs-10202623/v1)
Supplement: Supplementary file 1 [file a1be57b7c8c11f3970391b5c.docx]

**Supplementary Table S1.** Baseline characteristics of the maintenance hemodialysis patients

|  | Regular health-check | Clinically indicated | *p*-value |
| --- | --- | --- | --- |
| Patient, c n(%) | 159(78) | 46(22) |  |
| Dialysis vintage, b months | 44.0(20.0,72.0) | 42.5(23.5,83.3) | 0.928 |
| Age, a years | 57.5±15.3 | 60.8±11.5 | 0.120 |
| Gender, M/F | 92/67 | 29/17 | 0.529 |
| BMI, a kg/m2 | 22.3±4.0 | 22.2±3.5 | 0.973 |
| Kt/V | 1.5±0.3 | 1.5±0.3 | 0.948 |
| Hypertension, c n(%) | 145(91.2) | 42(91.3) | 1.000 |
| Diabetes, c n(%) | 61(38.4) | 18(39.1) | 0.925 |
| Calcium-free phosphate binders, c n(%) | 74(46.5) | 24(52.2) | 0.501 |
| Calcium-based phosphate binders, c n(%) | 11(6.9) | 4(8.7) | 0.748 |
| Active vitamin D3, c n(%) | 45(28.3) | 15(32.6) | 0.572 |
| Hemoglobin, a g/dl | 10.9±1.7 | 10.9±1.8 | 0.787 |
| hs-CRP, b mg/l | 1.5(0.4,4.6) | 1.3(0.1,6.9) | 0.666 |
| Total protein, a g/dl | 6.4±0.6 | 6.5±0.6 | 0.491 |
| Albumin, a g/dl | 3.8±0.5 | 3.7±0.4 | 0.514 |
| Creatinine, a mg/dl | 9.2±3.3 | 9.4±3.4 | 0.769 |
| Uric acid, a mg/dl | 5.9±1.8 | 5.9±1.9 | 0.885 |
| Urea, a mg/dl | 123.2±45.1 | 116.6±39.1 | 0.343 |
| Corrected calcium, a mg/dl | 9.5±0.8 | 9.4±0.7 | 0.289 |
| Phosphorus, a mg/dl | 5.2±1.5 | 5.3±1.7 | 0.762 |
| Magnesium, a mg/dl | 2.4±0.3 | 2.4±0.4 | 0.492 |
| Glucose, b mg/dl | 104.9(86.4,142.6) | 99.4(83.5,155.7) | 0.973 |
| Total cholesterol, a mg/dl | 148.1±44.9 | 144.6±39.1 | 0.629 |
| Triglyceride, b mg/dl | 127.5(91.2,202.8) | 142.6(85.0,227.6) | 0.699 |
| LDL-C, a mg/dl | 81.9±30.5 | 83.5±28.6 | 0.751 |
| HDL-C, a mg/dl | 38.7±13.9 | 36.0±12.0 | 0.227 |
| Alkaline phosphatase, b U/l | 89.0(67.0,115.0) | 86.0(63.8,127.0) | 0.966 |
| iPTH, b pg/ml | 197.6(92.6,380.4) | 145.3(78.0,402.5) | 0.423 |
| AoACS | 191(0,631) | 293(15,1039) | 0.255 |

BMI body mass index; hs-CRP hypersensitive C-reactive protein; LDL-C low-density lipoprotein cholesterol; HDL-C high-density lipoprotein cholesterol; iPTH intact parathyroid hormone.

a Data are presented as mean ± SD for normally distributed continuous variables.

b median (IQR) for non-normally distributed continuous variables.

c n (%) for categorical variables.

* *p* < 0.05

**Supplementary Table S2.** Variance inflation factors (VIFs) for multivariable Cox models

| **Model type** | **Predictor variable** | **VIF value** | **Included in final model** |
| --- | --- | --- | --- |
| Cardiovascular mortality | Age | 1.71 | Yes |
| Cardiovascular mortality | Diabetes | 1.16 | No |
| Cardiovascular mortality | Creatinine | 1.25 | No |
| Cardiovascular mortality | Log(AoACS+1) | 1.37 | Yes |
| All-cause mortality | Age | 1.88 | Yes |
| All-cause mortality | Diabetes | 1.40 | Yes |
| All-cause mortality | Creatinine | 1.86 | No |
| All-cause mortality | Urea | 1.57 | No |
| All-cause mortality | Alkaline phosphatase | 1.07 | No |
| All-cause mortality | Albumin | 1.15 | Yes |
| All-cause mortality | Glucose | 1.31 | No |
| All-cause mortality | Active vitamin D3 | 1.07 | No |
| All-cause mortality | Log(AoACS+1) | 1.47 | Yes |

Note: Dialysis vintage was evaluated but excluded from the final models due to non-significance in univariate Cox analysis.

**Supplementary Table S3.** Aortic arch calcification voxel counts and volumes by CT attenuation ranges

| HU Range | Voxel Count (n) | Calcium Volume (mm³) |
| --- | --- | --- |
| 130–199 | 703 | 1522.80 |
| 200–299 | 597 | 1293.19 |
| 300–399 | 325 | 704.00 |
| ≥400 | 412 | 892.46 |

**Supplementary Methods – AoACS Calculation on MANGO 4.1**

1. Import axial non-contrast DICOM images into MANGO 4.1.
2. Set the threshold to 130–199 HU (*Toolbox → Set Explicit Value Range*).
3. Manually outline the aortic arch ROI (the calcified component of the aortic arch) on every slice within the previously defined anatomical boundaries (*Toolbox → Paint Mode*).
4. Repeat steps 2–3 for 200–299 HU, 300–399 HU, and ≥ 400 HU, re-delineating the identical anatomical region of the aortic arch on each occasion.
5. Record the calcified volume (*Analysis → ROI Statistics → Volume → Size*, mm³); convert to area by dividing by the 5 mm slice thickness.
6. Multiply each volume-derived area by its density factor (1, 2, 3 or 4) and sum the four products to obtain the AoACS.

**Note on AoACS calculation**

AoACS is calculated in two mathematically equivalent ways:
• slice-by-slice summation of (area × density factor); or
• summation of the four partial scores obtained by integrating the calcified areas within each attenuation window multiplied by the respective density factors (1–4). Both methods yield identical result.
